# Supplementary material
Source: PubMed Central journal article supplement (PMC3400727)
Supplement: ejhg201213x1.pdf [file ejhg201213x1.pdf]

*“An exploration of genetic health professionals’ experience with direct to consumer genetic testing in their clinical practice.”*

Thankyou for choosing to participate in this study.

Our aim is to investigate the experiences of genetic health professionals with direct to consumer genetic testing (DTC-GT). This survey will ask you general questions regarding your experiences and to identify if you have had client(s) referred to you as a result of having undertaken DTC-GT. If appropriate, you will then be asked to answer questions regarding the nature of the consult.

The survey is completely anonymous and no personal details will be collected about yourself or your client(s). We will remove any references to personal information that might allow someone to guess your identity. However you should note that as the number of genetic health professionals who report consulting with relevant client(s) may be small, it is possible that someone may still be able to identify you.

Please begin the survey below, completion of which will be considered your consent to participate. Your participation in this study is completely voluntary. Should you wish to withdraw at any stage, or to withdraw any unprocessed data you have supplied, you are free to do so without prejudice.

1. Are you a qualified:

- |                                                       |                                                                   |
|-------------------------------------------------------|-------------------------------------------------------------------|
| <input type="checkbox"/> Genetic Counsellor           | <input type="checkbox"/> Clinical Genetics Trainee                |
| <input type="checkbox"/> Associate Genetic Counsellor | <input type="checkbox"/> None of the above → <i>Exit Survey**</i> |
| <input type="checkbox"/> Clinical Geneticist          |                                                                   |

**\*\*If you are not qualified in one of the listed professions, we thank you for participating in this survey as your time is greatly appreciated, however due to the limited nature of this study we require no further responses from you. Please still return the survey. If you would like to receive feedback regarding the results of this study, in the form of a short summary, please provide your contact details by email.**

-----  
2. In which country/countries are you a qualified [Q1]? \_\_\_\_\_

3. Are you currently practising as a [Q1]?

- |                              |                             |
|------------------------------|-----------------------------|
| <input type="checkbox"/> Yes | <input type="checkbox"/> No |
|------------------------------|-----------------------------|



8. For each client who consulted with you after undertaking DTC-GT, please indicate where you were practising at the time, approximately when the consultation took place and by which means the client was referred to you:

|                 |                      | Client |   |   |   |   |   |   |   |   |    |
|-----------------|----------------------|--------|---|---|---|---|---|---|---|---|----|
|                 |                      | 1      | 2 | 3 | 4 | 5 | 6 | 7 | 8 | 9 | 10 |
| <b>Location</b> | ACT, Australia       |        |   |   |   |   |   |   |   |   |    |
|                 | NSW, Australia       |        |   |   |   |   |   |   |   |   |    |
|                 | NT, Australia        |        |   |   |   |   |   |   |   |   |    |
|                 | QLD, Australia       |        |   |   |   |   |   |   |   |   |    |
|                 | SA, Australia        |        |   |   |   |   |   |   |   |   |    |
|                 | TAS, Australia       |        |   |   |   |   |   |   |   |   |    |
|                 | VIC, Australia       |        |   |   |   |   |   |   |   |   |    |
|                 | WA, Australia        |        |   |   |   |   |   |   |   |   |    |
|                 | Other                |        |   |   |   |   |   |   |   |   |    |
| <b>When</b>     | 2011                 |        |   |   |   |   |   |   |   |   |    |
|                 | 2010                 |        |   |   |   |   |   |   |   |   |    |
|                 | 2009                 |        |   |   |   |   |   |   |   |   |    |
|                 | 2008                 |        |   |   |   |   |   |   |   |   |    |
|                 | Pre-2008             |        |   |   |   |   |   |   |   |   |    |
| <b>Referral</b> | Self*                |        |   |   |   |   |   |   |   |   |    |
|                 | General Practitioner |        |   |   |   |   |   |   |   |   |    |
|                 | Medical Specialist   |        |   |   |   |   |   |   |   |   |    |
|                 | Other                |        |   |   |   |   |   |   |   |   |    |
|                 | Unknown              |        |   |   |   |   |   |   |   |   |    |

\* If self referred, please list (by client) any other medical professionals the client(s) consulted with regarding their DTC-GT: \_\_\_\_\_

---



---



---



---

9. Which DTC-GT companies had the client(s) utilised?

|                                                                                         | Client |   |   |   |   |   |   |   |   |    |
|-----------------------------------------------------------------------------------------|--------|---|---|---|---|---|---|---|---|----|
|                                                                                         | 1      | 2 | 3 | 4 | 5 | 6 | 7 | 8 | 9 | 10 |
| 23andMe ( <a href="http://www.23andme.com">www.23andme.com</a> )                        |        |   |   |   |   |   |   |   |   |    |
| Counsyl ( <a href="http://www.counsyl.com">www.counsyl.com</a> )                        |        |   |   |   |   |   |   |   |   |    |
| deCODEme ( <a href="http://www.decodeme.com">www.decodeme.com</a> )                     |        |   |   |   |   |   |   |   |   |    |
| DNAdirect ( <a href="http://www.dnadirect.com">www.dnadirect.com</a> )                  |        |   |   |   |   |   |   |   |   |    |
| easyGENETICS ( <a href="http://www.easygeneticstest.com">www.easygeneticstest.com</a> ) |        |   |   |   |   |   |   |   |   |    |
| Genetic Technologies ( <a href="http://www.gtglabs.com">www.gtglabs.com</a> )           |        |   |   |   |   |   |   |   |   |    |
| Illumina ( <a href="http://www.illumina.com">www.illumina.com</a> )                     |        |   |   |   |   |   |   |   |   |    |
| Knome ( <a href="http://www.knome.com">www.knome.com</a> )                              |        |   |   |   |   |   |   |   |   |    |
| Lumigenix ( <a href="http://www.lumigenix.com">www.lumigenix.com</a> )                  |        |   |   |   |   |   |   |   |   |    |
| MyGeneProfile ( <a href="http://www.mygeneprofile.com">www.mygeneprofile.com</a> )      |        |   |   |   |   |   |   |   |   |    |
| Navigenics ( <a href="http://www.navigenics.com">www.navigenics.com</a> )               |        |   |   |   |   |   |   |   |   |    |
| Pathway Genomics ( <a href="http://www.pathway.com">www.pathway.com</a> )               |        |   |   |   |   |   |   |   |   |    |
| Unknown                                                                                 |        |   |   |   |   |   |   |   |   |    |

Please list any other companies used and by which client: \_\_\_\_\_

\_\_\_\_\_

\_\_\_\_\_

\_\_\_\_\_

\_\_\_\_\_

10. Did the client(s) seek your services specifically as a result of their DTC-GT? (ie. Not referred for other reasons)

|            | Client |   |   |   |   |   |   |   |   |    |
|------------|--------|---|---|---|---|---|---|---|---|----|
|            | 1      | 2 | 3 | 4 | 5 | 6 | 7 | 8 | 9 | 10 |
| Yes        |        |   |   |   |   |   |   |   |   |    |
| No         |        |   |   |   |   |   |   |   |   |    |
| Don't know |        |   |   |   |   |   |   |   |   |    |

Comments: \_\_\_\_\_

\_\_\_\_\_

\_\_\_\_\_

\_\_\_\_\_

\_\_\_\_\_

11. What type of DTC-GT was ordered by the client(s)?

|                                                      | Client |   |   |   |   |   |   |   |   |    |
|------------------------------------------------------|--------|---|---|---|---|---|---|---|---|----|
|                                                      | 1      | 2 | 3 | 4 | 5 | 6 | 7 | 8 | 9 | 10 |
| Testing of one or more SNPs or CNVs in a single gene |        |   |   |   |   |   |   |   |   |    |
| Full sequencing of a single gene                     |        |   |   |   |   |   |   |   |   |    |
| Testing of multiple SNPs or CNVs in multiple genes   |        |   |   |   |   |   |   |   |   |    |
| Full sequencing of two or more genes                 |        |   |   |   |   |   |   |   |   |    |
| Whole exome sequencing (next generation sequencing)  |        |   |   |   |   |   |   |   |   |    |
| Whole genome sequencing (next generation sequencing) |        |   |   |   |   |   |   |   |   |    |
| Unknown                                              |        |   |   |   |   |   |   |   |   |    |

Please list any other tests ordered and by which client: \_\_\_\_\_

\_\_\_\_\_

\_\_\_\_\_

\_\_\_\_\_

\_\_\_\_\_

12. If you know how much your client(s) paid for DTC-GT and feel comfortable disclosing the amount, please select the appropriate price range in US\$ for each client:

|             | Client |   |   |   |   |   |   |   |   |    |
|-------------|--------|---|---|---|---|---|---|---|---|----|
|             | 1      | 2 | 3 | 4 | 5 | 6 | 7 | 8 | 9 | 10 |
| \$0-500     |        |   |   |   |   |   |   |   |   |    |
| \$500-1000  |        |   |   |   |   |   |   |   |   |    |
| \$1000-1500 |        |   |   |   |   |   |   |   |   |    |
| \$1500-2000 |        |   |   |   |   |   |   |   |   |    |
| \$2000 +    |        |   |   |   |   |   |   |   |   |    |
| Don't know  |        |   |   |   |   |   |   |   |   |    |

Comments: \_\_\_\_\_

\_\_\_\_\_

\_\_\_\_\_

\_\_\_\_\_

\_\_\_\_\_

13. We are also trying to get an indication of the reasons individuals choose to undertake DTC-GT. Please tick the boxes corresponding to factors identified by the client(s) as motivating their choice:

|                                                                                           | Client |   |   |   |   |   |   |   |   |    |
|-------------------------------------------------------------------------------------------|--------|---|---|---|---|---|---|---|---|----|
|                                                                                           | 1      | 2 | 3 | 4 | 5 | 6 | 7 | 8 | 9 | 10 |
| Wanting to identify monogenic conditions, including carrier testing                       |        |   |   |   |   |   |   |   |   |    |
| Wanting to know their susceptibility/predisposition for complex conditions                |        |   |   |   |   |   |   |   |   |    |
| For pharmacogenetic uses                                                                  |        |   |   |   |   |   |   |   |   |    |
| Wanting to assess their sporting ability                                                  |        |   |   |   |   |   |   |   |   |    |
| For academic purposes (eg. interest or curiosity)                                         |        |   |   |   |   |   |   |   |   |    |
| For other non health related applications (eg ancestry, nutrigenetics, paternity testing) |        |   |   |   |   |   |   |   |   |    |

Please list any other reasons given and by which client: \_\_\_\_\_  
 \_\_\_\_\_  
 \_\_\_\_\_  
 \_\_\_\_\_  
 \_\_\_\_\_

14. Did the client(s) appear satisfied with their chosen DTC-GT service(s)?

|                    | Client |   |   |   |   |   |   |   |   |    |
|--------------------|--------|---|---|---|---|---|---|---|---|----|
|                    | 1      | 2 | 3 | 4 | 5 | 6 | 7 | 8 | 9 | 10 |
| Very satisfied     |        |   |   |   |   |   |   |   |   |    |
| Somewhat satisfied |        |   |   |   |   |   |   |   |   |    |
| Not satisfied      |        |   |   |   |   |   |   |   |   |    |
| Don't know         |        |   |   |   |   |   |   |   |   |    |

Comments: \_\_\_\_\_  
 \_\_\_\_\_  
 \_\_\_\_\_  
 \_\_\_\_\_  
 \_\_\_\_\_

15. Did the client(s) regret having the test?

|            | Client |   |   |   |   |   |   |   |   |    |
|------------|--------|---|---|---|---|---|---|---|---|----|
|            | 1      | 2 | 3 | 4 | 5 | 6 | 7 | 8 | 9 | 10 |
| Yes        |        |   |   |   |   |   |   |   |   |    |
| No         |        |   |   |   |   |   |   |   |   |    |
| Don't know |        |   |   |   |   |   |   |   |   |    |

Comments: \_\_\_\_\_

\_\_\_\_\_

\_\_\_\_\_

\_\_\_\_\_

\_\_\_\_\_

16. For each client, do you think that the DTC-GT process was:

|                                | Client |   |   |   |   |   |   |   |   |    |
|--------------------------------|--------|---|---|---|---|---|---|---|---|----|
|                                | 1      | 2 | 3 | 4 | 5 | 6 | 7 | 8 | 9 | 10 |
| A waste of client time         |        |   |   |   |   |   |   |   |   |    |
| A waste of clinic time         |        |   |   |   |   |   |   |   |   |    |
| Was beneficial for the client  |        |   |   |   |   |   |   |   |   |    |
| Was beneficial for you         |        |   |   |   |   |   |   |   |   |    |
| Created anxiety for the client |        |   |   |   |   |   |   |   |   |    |
| Created anxiety for yourself   |        |   |   |   |   |   |   |   |   |    |
| Easy to manage                 |        |   |   |   |   |   |   |   |   |    |
| Difficult to counsel           |        |   |   |   |   |   |   |   |   |    |

Comments: \_\_\_\_\_

\_\_\_\_\_

\_\_\_\_\_

\_\_\_\_\_

\_\_\_\_\_

17. What reason(s) were given by the client(s) seeking your professional services in regard to their DTC-GT?

|                                            | Client |   |   |   |   |   |   |   |   |    |
|--------------------------------------------|--------|---|---|---|---|---|---|---|---|----|
|                                            | 1      | 2 | 3 | 4 | 5 | 6 | 7 | 8 | 9 | 10 |
| Needed help interpreting the results       |        |   |   |   |   |   |   |   |   |    |
| Concerned for own health                   |        |   |   |   |   |   |   |   |   |    |
| Concerned for health of family members     |        |   |   |   |   |   |   |   |   |    |
| Seeking reproductive risk information      |        |   |   |   |   |   |   |   |   |    |
| Questioning validity of DTC-GT results     |        |   |   |   |   |   |   |   |   |    |
| Seeking further genetic testing            |        |   |   |   |   |   |   |   |   |    |
| Seeking information on specific conditions |        |   |   |   |   |   |   |   |   |    |

Please list any other reasons given and by which client: \_\_\_\_\_

\_\_\_\_\_

\_\_\_\_\_

\_\_\_\_\_

18. What was the outcome of the consultation?

|                                                                | Client |   |   |   |   |   |   |   |   |    |
|----------------------------------------------------------------|--------|---|---|---|---|---|---|---|---|----|
|                                                                | 1      | 2 | 3 | 4 | 5 | 6 | 7 | 8 | 9 | 10 |
| Extensive counselling/multiple consults                        |        |   |   |   |   |   |   |   |   |    |
| Genetic tests ordered to confirm DTC-GT results                |        |   |   |   |   |   |   |   |   |    |
| Genetic tests ordered in addition to DTC-GT tests              |        |   |   |   |   |   |   |   |   |    |
| Client(s) referred to specialist health professional(s)        |        |   |   |   |   |   |   |   |   |    |
| Family member(s) referred for genetic consultation/counselling |        |   |   |   |   |   |   |   |   |    |
| No further action                                              |        |   |   |   |   |   |   |   |   |    |

Please list any other outcomes and for which client: \_\_\_\_\_

\_\_\_\_\_

\_\_\_\_\_

\_\_\_\_\_



19. In your opinion, was the client(s) DTC-GT clinically useful?

|                 | Client |   |   |   |   |   |   |   |   |    |
|-----------------|--------|---|---|---|---|---|---|---|---|----|
|                 | 1      | 2 | 3 | 4 | 5 | 6 | 7 | 8 | 9 | 10 |
| Very useful     |        |   |   |   |   |   |   |   |   |    |
| Somewhat useful |        |   |   |   |   |   |   |   |   |    |
| Not useful      |        |   |   |   |   |   |   |   |   |    |
| No opinion      |        |   |   |   |   |   |   |   |   |    |

Comments: \_\_\_\_\_  
\_\_\_\_\_  
\_\_\_\_\_  
\_\_\_\_\_

20. Do you have any further comments regarding your experience with clients who had undertaken DTC-GT? \_\_\_\_\_

\_\_\_\_\_  
\_\_\_\_\_  
\_\_\_\_\_  
\_\_\_\_\_  
\_\_\_\_\_  
\_\_\_\_\_  
\_\_\_\_\_  
\_\_\_\_\_  
\_\_\_\_\_

Thankyou for participating in this survey, your time is greatly appreciated.

If you would like to receive feedback regarding the results of this study, in the form of a short summary, please provide your contact details by email.

Additionally, if you are interested in participating in an interview regarding your experiences with DTC-GT in your clinical practise, please specify this in your email.
